# Supplementary material
Source: PubMed Central journal article supplement (PMC5994727)
Supplement: am8b03658_si_001.pdf [file am8b03658_si_001.pdf]

# High-temperature Shape Memory Behavior of Semi-crystalline Polyamide Thermosets

*Ming Li,<sup>†, ‡, §</sup> Qingbao Guan,<sup>||</sup> and Theo J. Dingemans<sup>\*, ‡, ⊥</sup>*

<sup>†</sup> National Engineering Research Center for Biotechnology, Nanjing Tech University,  
Nanjing, 211800, China.

<sup>‡</sup> Delft University of Technology, Faculty of Aerospace Engineering, Kluyverweg 1, 2629 HS  
Delft, The Netherlands

<sup>§</sup> Dutch Polymer Institute (DPI), P.O. Box 902, 5600 AX Eindhoven, The Netherlands

<sup>||</sup> Soochow University, Department of Material Science and Engineering, Suzhou, 215123,  
China

<sup>⊥</sup> University of North Carolina at Chapel Hill, Department of Applied Physical Sciences, 1113  
Murray Hall, Chapel Hill, NC27599-3050, USA

\*Corresponding author: Tel. 919–843–4048, E-mail: [tjd@unc.edu](mailto:tjd@unc.edu)

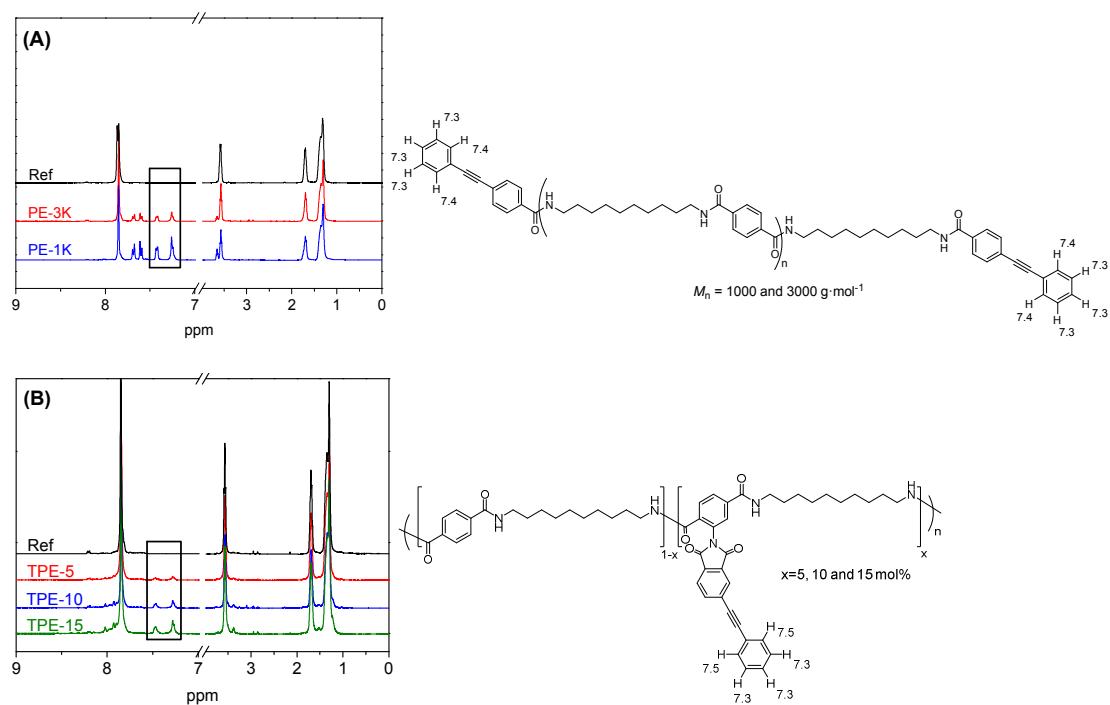

**Figure S1.**  $^1\text{H}$  NMR spectra of (A) Ref, PE-3K and PE-1K; (B) Ref, TPE-5, TPE-10 and TPE-15. For clarity, the phenylethynyl proton peaks captured by the rectangular frames are labelled in the molecular structure provided.
